# Supplementary material for: Comparative Effectiveness of Collaborative Chronic Care Models for Mental Health Conditions Across Primary, Specialty, and Behavioral Health Care Settings: Systematic Review and Meta-Analysis
Source: Atypon-hosted journal article supplement (doi:10.1176/appi.focus.11.4.552), 2013-10-01
Supplement: 552_ds001.pdf [file 552_ds001.pdf]

**On-Line Supplement, MS #AJP-11-11-1616-R2, Woltmann et al “Comparative Effectiveness of Collaborative Chronic Care Models for Mental Health...”**

**e-Figure 1: Adapted PRISMA Flow Diagram (this file)**

**e-Table 1: Summary of Trial Designs (accompanying file)**

**e-Table 2: Summary of Outcome Analyses**

**e-Figure 1: Adapted PRISMA Flow Diagram**

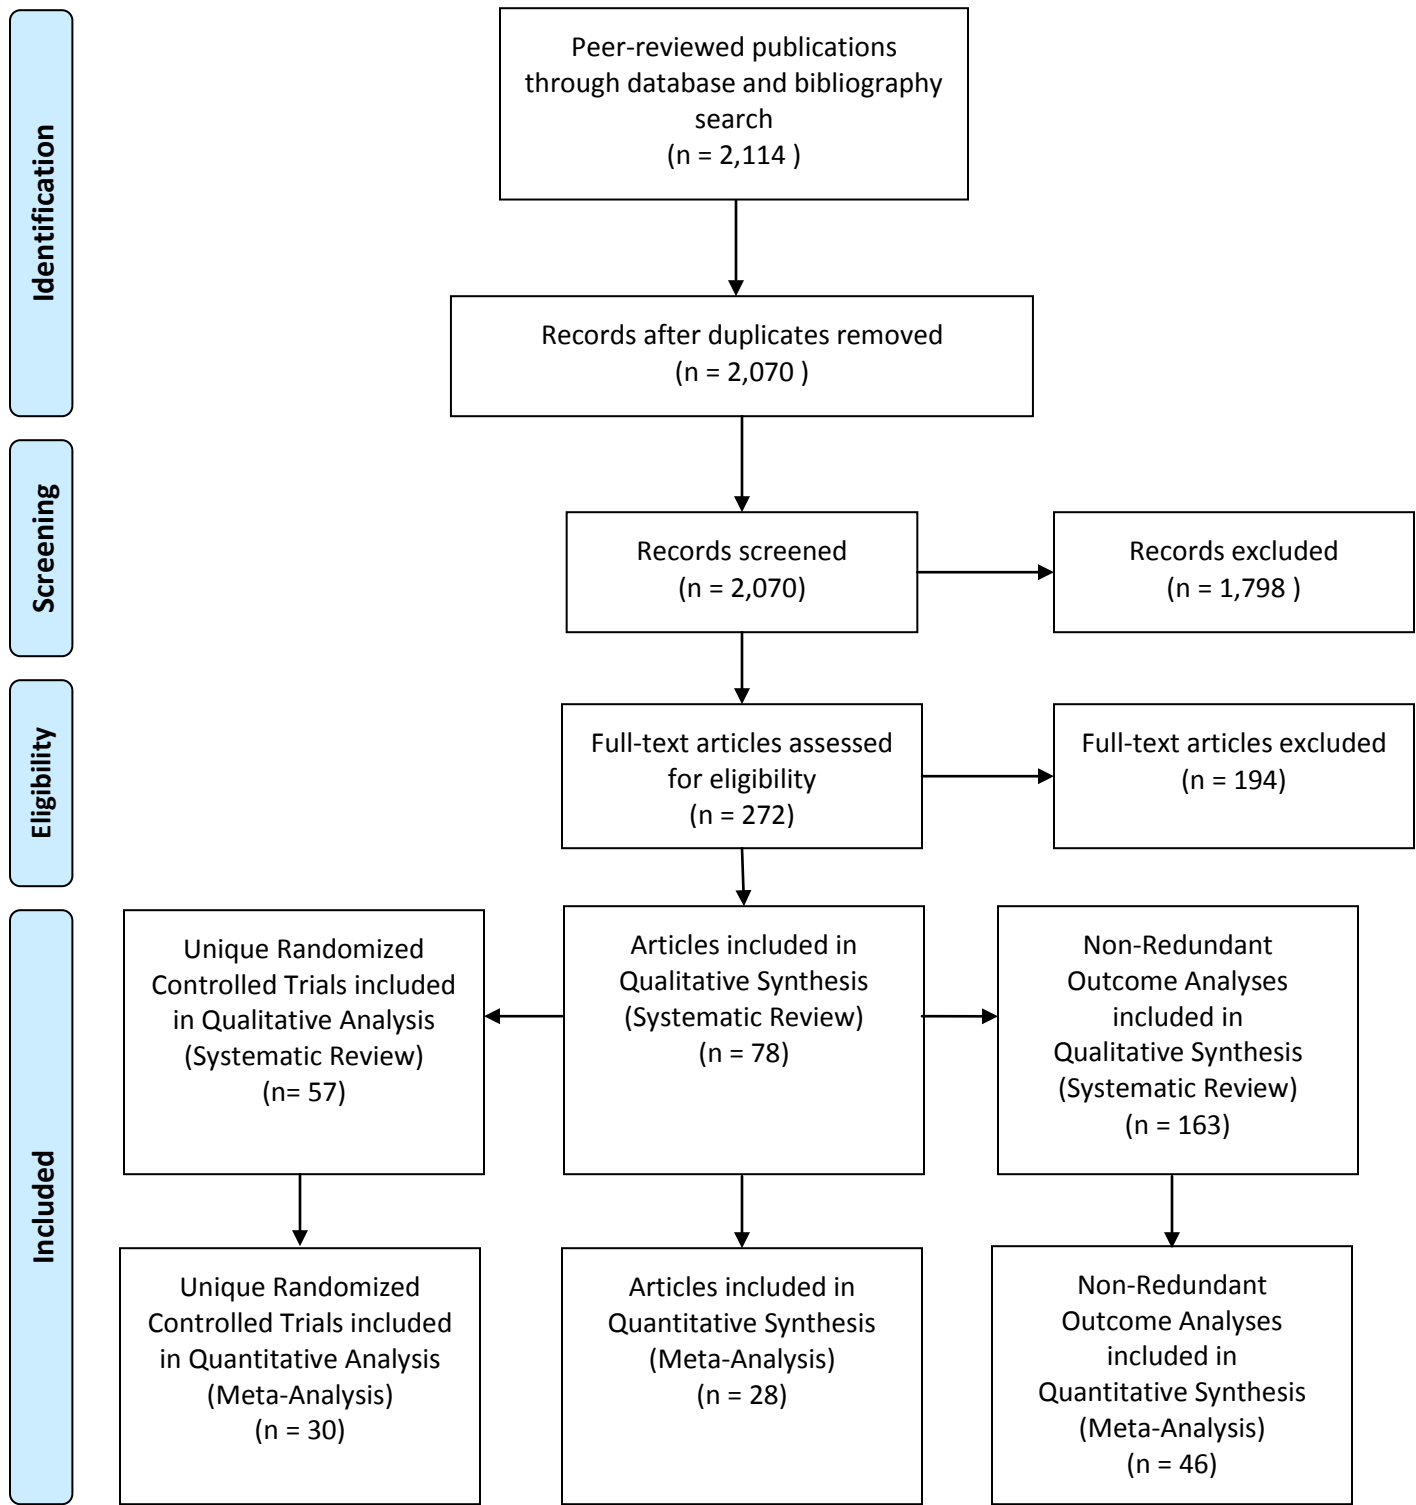

**Figure 1 Legend:** Search yield according to the Preferred Reporting Items for Systematic Reviews and Meta-Analyses (PRISMA) rubric (39).

**e-Table 1: Summary of Trial Designs**

| <b>Parent RCT</b>             | <b>Diagnoses</b>                                                           | <b>Recruitment Locus (Target Population)</b> | <b>System<sup>b</sup></b> | <b>Total CCM Components<sup>c</sup></b> | <b>Control Condition</b>            | <b>N Randomized</b> | <b>Age (mean)</b>          | <b>Women (%)</b>             | <b>Minority (%)</b>          |
|-------------------------------|----------------------------------------------------------------------------|----------------------------------------------|---------------------------|-----------------------------------------|-------------------------------------|---------------------|----------------------------|------------------------------|------------------------------|
| <b>DEPRESSION</b>             |                                                                            |                                              |                           |                                         |                                     |                     |                            |                              |                              |
| Callahan, 1994 (40)           | Depression screen (CES-D) positive + Hamilton Depression Rating Scale > 15 | Primary Care                                 | VA                        | 3                                       | Usual Care                          | 175                 | 65.5 (CCM), 65.1 (control) | 76.0% (CCM), 75.7% (control) | 50.0% (CCM), 52.7% (control) |
| Katon, 1995 (41) <sup>a</sup> | Probable major depression                                                  | Primary Care                                 | Staff Model HMO           | 4                                       | Primary Care Clinician Notification | 91                  | 43.2 (CCM), 42.3 (control) | 77.5% (CCM), 88.1% (control) | not reported                 |
| Katon, 1995 (41) <sup>a</sup> | Probable minor depression                                                  | Primary Care                                 | Staff Model HMO           | 4                                       | Primary Care Clinician Notification | 126                 | 52.2 (CCM), 50.3 (control) | 76.3% (CCM), 68.7% (control) | not reported                 |
| Katon, 1996 (42) <sup>a</sup> | Probable major depression                                                  | Primary Care                                 | Staff Model HMO           | 4                                       | Primary Care Clinician Notification | 65                  | 43.1 (CCM), 44.8 (control) | 77.4% (CCM), 73.5% (control) | 22.6% (CCM), 8.8% (control)  |
| Katon, 1996 (42) <sup>a</sup> | Probable minor depression                                                  | Primary Care                                 | Staff Model HMO           | 3                                       | Primary Care Clinician Notification | 88                  | 49.2 (CCM), 47.2 (control) | 71.7% (CCM), 73.8% (control) | 8.7% (CCM), 14.3% (control)  |

|                             |                                                                          |                                   |                 |   |                                                            |      |                                                  |                              |                              |
|-----------------------------|--------------------------------------------------------------------------|-----------------------------------|-----------------|---|------------------------------------------------------------|------|--------------------------------------------------|------------------------------|------------------------------|
| Mann, 1998 (43)             | Depressed for at least 4 weeks, either new or ongoing treatment          | Primary Care                      | Non-Integrated  | 3 | Usual Care                                                 | 419  | 41.3 (women), 48.3 (men)                         | 78%                          | not reported                 |
| Katon, 1999 (44)            | Depression or dysthymia                                                  | Primary Care                      | Staff Model HMO | 4 | Primary Care Clinician Notification                        | 228  | 47.2 (CCM), 46.7 (control)                       | 67.5% (CCM), 81.6% (control) | 20.2% (CCM), 19.3% (control) |
| Katzelnick, 2000 (45)       | Major depression, current or partial remission                           | Registry of all service utilizers | Non-Integrated  | 4 | Patient notification of depression diagnosis and resources | 407  | 45.6 (CCM), 45.4 (control)                       | 76.6% (CCM), 78.3% (control) | 23.4% (CCM), 21.7% (control) |
| Simon, 2000 (46)            | New antidepressant prescription and clinical diagnosis of depression     | Primary Care                      | Staff Model HMO | 3 | Usual Care                                                 | 613  | 46.3 (CCM), 46.5 (feedback only), 46.8 (control) | not reported                 | not reported                 |
| Wells, 2000 (47)            | Probable depressive disorder                                             | Primary Care                      | Staff Model HMO | 5 | Usual Care                                                 | 1356 | 43.7                                             | 71%                          | 43%                          |
| Katon, 2001 (48)            | Minor depression or major depression or dysthymia remitted for > 8 weeks | Primary Care                      | Staff Model HMO | 3 | Primary Care Clinician Notification                        | 386  | 46.4 (CCM), 45.6 (control)                       | 75.4% (CCM), 71.9% (control) | 7.7% (CCM), 12% (control)    |
| Rost, 2001 (49)             | Major depression                                                         | Primary Care                      | Non-Integrated  | 3 | Usual Care                                                 | 479  | 42.6                                             | 83.9%                        | 15.7%                        |
| Simon, 2001 (50)            | Current major depression or residual symptoms                            | Registry of all service utilizers | Staff Model HMO | 4 | Usual Care                                                 | 407  | 45.6 (CCM), 45.4 (control)                       | 77% (CCM), 78% (control)     | not reported                 |
| Unutzer, 2002 (51) (IMPACT) | Major depression, dysthymia, or both                                     | Primary Care                      | Staff Model HMO | 4 | Usual Care                                                 | 1801 | 71.2                                             | 65%                          | 23%                          |

|                               |                                                                     |                   |                 |   |                                     |     |                            |                              |                              |
|-------------------------------|---------------------------------------------------------------------|-------------------|-----------------|---|-------------------------------------|-----|----------------------------|------------------------------|------------------------------|
| Araya, 2003 (52)              | Major depression                                                    | Primary Care      | Non-integrated  | 3 | Usual Care                          | 240 | 44.1 (CCM), 42.0 (control) | 100%                         | 100%                         |
| Datto, 2003 (53)              | Primary care clinician report of depression and CES-D score > 16    | Primary Care      | Non-Integrated  | 4 | Usual Care                          | 61  | 47.6                       | 60.7%                        | 20%                          |
| Hedrick, 2003 (54)            | Major depression or dysthymia                                       | Primary Care      | VA              | 4 | Consultation-Liaison                | 354 | 57.8 (CCM), 56.6 (control) | 4.8% (CCM), 4.3% (control)   | 22% (CCM), 18.8% (control)   |
| Swindle, 2003 (55)            | Major depression, dysthymia, or partially remitted major depression | Primary Care      | VA              | 3 | Primary Care Clinician Notification | 268 | 56.4 (CCM), 56.2 (control) | 3% (CCM), 4% (control)       | 16% (CCM), 13% (control)     |
| Adler, 2004 (56)              | Major depression or dysthymia                                       | Primary Care      | VA              | 4 | Primary Care Clinician Notification | 533 | 42.9 (CCM), 41.7 (control) | 69.4% (CCM), 74.3% (control) | 27.9% (CCM), 27.2% (control) |
| Bruce, 2004 (PROSPECT) (57)   | Depressive symptom severity above threshold                         | Primary Care      | Multiple        | 5 | Usual Care                          | 598 | 30.8% over age 75          | 71.6%                        | 28.4%                        |
| Capoccia, 2004 (58)           | New episode of depression or new antidepressant trial               | Primary Care      | Non-Integrated  | 4 | Usual Care                          | 74  | 38.2 (CCM), 39.4 (control) | 83% (CCM), 70% (control)     | 22% (CCM), 21% (control)     |
| Dietrich, 2004 (RESPECT) (59) | Major depression or dysthymia                                       | Multiple/ Unclear | Non-integrated  | 3 | Usual Care + clinician education    | 405 | 41.8 (CCM), 42.2 (control) | 83.5% (CCM), 76.2% (control) | 16% (CCM), 18% (control)     |
| Katon, 2004 (Pathways) (60)   | Diabetes mellitus and comorbid depression or dysthymia              | Primary Care      | Staff Model HMO | 4 | Primary Care Clinician Notification | 329 | 58.6 (CCM), 58.1 (control) | 65.2% (CCM), 64.8% (control) | 24.8% (CCM), 18.9% (control) |

|                                             |                                                                                       |                       |                 |                |            |     |                                                |                                               |                                               |
|---------------------------------------------|---------------------------------------------------------------------------------------|-----------------------|-----------------|----------------|------------|-----|------------------------------------------------|-----------------------------------------------|-----------------------------------------------|
| Simon, 2004 (61)                            | Clinical diagnosis of depression                                                      | Primary Care          | Staff Model HMO | 4 <sup>c</sup> | Usual Care | 600 | 44.9 (tCCM), 44.7 (tCCM-therapy), 44 (control) | 78% (tCCM), 72% (tCCM-therapy), 74% (control) | 21% (tCCM), 15% (tCCM-therapy), 25% (control) |
| Trivedi, 2004 (62)                          | Major depression                                                                      | Mental Health         | Non-Integrated  | 6              | Usual Care | 547 | 41.1 (CCM)                                     | 80% (CCM), 80% (control)                      | 39.4% (CCM), 54.9% (control)                  |
| Asarnow, 2005 (Youth Partners in Care) (63) | Depressive symptom severity above threshold                                           | Primary Care          | Multiple        | 5              | Usual Care | 418 | 17.2                                           | 78%                                           | 87.3%                                         |
| Dwight-Johnson, 2005 (64)                   | Cancer patients with depression or dysthymia                                          | Non-primary           | Non-Integrated  | 4              | Usual Care | 55  | 47.7 (CCM), 46.8 (control)                     | 100%                                          | 100% Latina                                   |
| Dobscha, 2006 (65)                          | Depressive symptom severity above threshold                                           | Primary Care          | VA              | 4              | Usual Care | 375 | 57.3 (CCM), 56.3 (control)                     | 7.4% (CCM), 7.5% (control)                    | 1.1% (CCM), 4.3% (control)                    |
| Simon, 2006 (66)                            | New antidepressant prescription and depressive symptom severity score above threshold | Mental Health Clinics | Staff Model HMO | 4 <sup>c</sup> | Usual Care | 207 | 41 (tCCM), 45 (control)                        | 69% (tCCM), 61% (control)                     | 11% (tCCM), 11% (control)                     |
| Fortney, 2007 (67)                          | Depressive symptom severity above threshold                                           | Primary Care          | VA              | 4 <sup>c</sup> | Usual Care | 395 | 59.2                                           | 8.3%                                          | 25.3%                                         |
| Ell, 2008 (68)                              | Cancer patients with depression or dysthymia                                          | Non-primary           | Non-integrated  | 4              | Usual Care | 472 | 49.4% > age 50                                 | 100%                                          | 100% Latina                                   |

|                                          |                                                                                |                                                                |                |                |                                                                                       |     |                                                                 |                                                            |                                        |
|------------------------------------------|--------------------------------------------------------------------------------|----------------------------------------------------------------|----------------|----------------|---------------------------------------------------------------------------------------|-----|-----------------------------------------------------------------|------------------------------------------------------------|----------------------------------------|
| Richards, 2008 (69)                      | Major depression                                                               | Primary Care                                                   | Non-Integrated | 4              | Usual Care                                                                            | 114 | 42.63 (CCM), 43.0 (control), 41.71 (cluster-randomized control) | 78% (CCM), 76% (control), 77% (cluster-randomized control) | not reported                           |
| Ross, 2008 (70)                          | Minor depression or subsyndromal distress due to depressive symptoms           | Primary Care                                                   | Non-Integrated | 3 <sup>c</sup> | Patient and primary care clinician notification of depression diagnosis and resources | 223 | 59.2                                                            | 93.2%                                                      | 56.9%                                  |
| Kroenke, 2009 (71)                       | Chronic moderate hip, back, or knee pain plus depression and PHQ-9 > 10        | Primary Care                                                   | Non-Integrated | 4              | Usual Care + Patient Education Materials                                              | 250 | 55.2 (CCM), 55.8 (control)                                      | 56% (CCM), 50% (control)                                   | 61% (CCM), 60% (control)               |
| Rollman, 2009 (Bypassing the Blues) (72) | Depressive symptom severity above threshold                                    | Pre-discharge from acute hospitalization                       | Multiple       | 4 <sup>c</sup> | Patient and primary care clinician notification of depression diagnosis and resources | 302 | 64 (CCM), 64 (control)                                          | 46% (CCM), 27% (control)                                   | 12% (CCM), 7% (control)                |
| Davidson, 2010 (73)                      | Depression with Beck Depression Inventory score >10 at 3 months post-discharge | Pre-discharge from hospitalization for acute coronary syndrome | Non-Integrated | 4              | Usual Care + Clinician Notification                                                   | 237 | 59.3 (CCM), 61.1 (control)                                      | 54% (CCM), 53% (control)                                   | 60% (CCM), 64% (control)               |
| Eli, 2010 (74)                           | Diabetes plus clinically significant depressive symptoms                       | Primary Care                                                   | Non-Integrated | 4              | Usual Care + Primary Care Notification and Patient Education Materials                | 387 | Age >50: 75.1% (CCM), 69.1% (control)                           | 79.8% (CCM), 84.5% (control)                               | Hispanic: 94.8% (CCM), 97.4% (control) |



|                             |                                                                                        |               |                 |   |                                                            |     |                            |                              |                                                    |
|-----------------------------|----------------------------------------------------------------------------------------|---------------|-----------------|---|------------------------------------------------------------|-----|----------------------------|------------------------------|----------------------------------------------------|
| Katon, 2010 (75)            | Clinically significant depressive symptoms plus diabetes and/or coronary heart disease | Primary Care  | Staff Model HMO | 4 | Usual Care + Primary Care Clinician Notification           | 214 | 57.4 (CCM), 56.3 (control) | 48% (CCM), 56% (control)     | 25% (CCM), 22% (control)                           |
| Vera 2010 (76)              | Major Depression + Chronic Medical Illness                                             | Primary Care  | Non-Integrated  | 3 | Usual Care                                                 | 179 | 57.0 (CCM), 53.5 (control) | 74% (CCM), 78% (control)     | 100% Spanish-Speaking Puerto Rican (CCM + control) |
| Yeung, 2010 (77)            | Major Depressive Disorder                                                              | Primary Care  | Non-Integrated  | 3 | Usual Care                                                 | 100 | 51 (CCM), 48 (control)     | 80% (CCM), 55% (control)     | 100% Asian American                                |
| <b>BIPOLAR DISORDERS</b>    |                                                                                        |               |                 |   |                                                            |     |                            |                              |                                                    |
| Suppes, 2003 (78)           | Bipolar I or schizoaffective bipolar type                                              | Mental Health | Non-integrated  | 4 | Usual Care                                                 | 267 | 38 (CCM), 39.7 (control)   | 72.3% (CCM), 62.7% (control) | 41.1% (CCM), 38.4% (control)                       |
| Bauer, 2006 (79) (CSP #430) | Bipolar I or II                                                                        | Pre-discharge | VA              | 4 | Usual Care                                                 | 330 | 46.6                       | 28%                          | 71%                                                |
| Simon 2006 (80)             | Bipolar I or II, cyclothymia, schizoaffective disorder                                 | Mental Health | Staff Model HMO | 3 | Usual Care                                                 | 441 | 44.1 (CCM), 44.3 (control) | 67.9% (CCM), 68.6% (control) | 13% (CCM), 10% (control)                           |
| Kilbourne 2008 (81)         | Bipolar I, II, or not otherwise specified                                              | Mental Health | VA              | 4 | Provider education                                         | 58  | 55.3                       | 9%                           | 10%                                                |
| <b>ANXIETY DISORDERS</b>    |                                                                                        |               |                 |   |                                                            |     |                            |                              |                                                    |
| Rollman, 2005 (82)          | Panic or generalized anxiety disorder                                                  | Primary Care  | Non-integrated  | 4 | Patient notification of depression diagnosis and resources | 191 | 44.2                       | 81%                          | 5%                                                 |

|                                    |                                                                                                |                                          |                 |   |                                                                                                   |      |                            |                              |                              |
|------------------------------------|------------------------------------------------------------------------------------------------|------------------------------------------|-----------------|---|---------------------------------------------------------------------------------------------------|------|----------------------------|------------------------------|------------------------------|
| Roy-Byrne, 2005 (83)               | Panic disorder                                                                                 | Primary Care                             | Non-integrated  | 4 | Primary care clinician notification                                                               | 232  | 41.2                       | 67%                          | 34.5%                        |
| Roy-Byrne, 2010 (84)               | Any anxiety disorder                                                                           | Primary Care                             | Non-integrated  | 4 | Usual Care                                                                                        | 1004 | 43.3 (CCM), 43.7 (control) | 71.4% (CCM), 70.9% (control) | 44.5% (CCM), 42.35 (control) |
| <b>OTHER OR MULTIPLE DISORDERS</b> |                                                                                                |                                          |                 |   |                                                                                                   |      |                            |                              |                              |
| Coleman, 1999 (85)                 | Elderly at high risk for hospitalization or functional decline by validated computer algorithm | Primary Care                             | Staff Model HMO | 3 | Usual Care                                                                                        | 169  | 77.3 (CCM), 77.4 (control) | 47.9% (CCM), 49.3% (control) | 2.8% (CCM), 4.1% (control)   |
| Druss, 2001 (86)                   | Any clinical mental health diagnosis and no primary care provider                              | Mental Health                            | VA              | 3 | Usual Care + referral to primary care                                                             | 120  | 45.7 (CCM), 44.8 (control) | 0% (CCM), 1.6% (control)     | 23.7% (CCM), 36.1% (control) |
| Oslin, 2003 (87)                   | Major depression, dysthymia, or at-risk drinking                                               | Primary Care                             | VA              | 4 | Usual Care                                                                                        | 97   | 61.3 (CCM), 61.9 (control) | 3.9% (CCM), 4.3% (control)   | 58.8% (CCM), 41.3% (control) |
| Zatzick, 2004 (88)                 | Depressive and/or PTSD symptom severity above threshold                                        | Pre-discharge from acute hospitalization | Non-integrated  | 4 | Usual Care                                                                                        | 121  | 37.1 (CCM), 44.4 (control) | 60% (CCM), 51% (control)     | 32.2% (CCM), 36.1% (control) |
| Callahan, 2006 (89)                | Alzheimer's disease patients and their care givers                                             | Primary Care                             | Non-Integrated  | 4 | Usual Care + educational material and consultation to family, primary care clinician notification | 153  | 77.4 (CCM), 77.7 (control) | 46.4% (CCM), 39.1% (control) | 41.7% (CCM), 58.0% (control) |
| Smith, 2006 (90)                   | Medically unexplained symptoms                                                                 | Registry of all service utilizers        | Staff Model HMO | 4 | Usual Care                                                                                        | 206  | 48.8 (CCM), 46.6 (control) | 82.2% CCM, 76.2% control)    | not reported                 |

|                          |                                                                                                       |               |                |   |                                                         |       |                            |                              |                                     |
|--------------------------|-------------------------------------------------------------------------------------------------------|---------------|----------------|---|---------------------------------------------------------|-------|----------------------------|------------------------------|-------------------------------------|
| Van Straten, 2006 (91)   | Major depression, dysthymia, generalized anxiety disorder, panic disorder, or social anxiety disorder | Mental Health | Non-integrated | 3 | Usual Care                                              | 702   | 36.4                       | 61%                          | not reported                        |
| Van Orden, 2009 (92)     | Any clinical mental health diagnosis                                                                  | Primary Care  | Non-integrated | 3 | Usual Care                                              | 165   | 40.2 (CCM), 40.4 (control) | 72% (CCM), 62% (control)     | Demographics given by subgroup only |
| Druss, 2010 (PCARE) (93) | Any clinical mental health diagnosis                                                                  | Mental Health | Non-integrated | 4 | Usual Care + list of primary care resources to patients | 407   | 47.0 (CCM), 46.3 (control) | 51.2% (CCM), 45.5% (control) | 78.5% (CCM), 79.7% (control)        |
| Patel, 2010 (94)         | Positive screen for common mental disorders on General Health Questionnaire                           | Primary Care  | Non-integrated | 4 | Primary Care Clinician Notification                     | 2,796 | 40-49 (each group)         | 82% (CCM), 83% (control)     | N/A                                 |

<sup>a</sup>Katon, 1995 (41) and Katon, 1996 (42) each report two separate randomized controlled trials in the same article.

<sup>b</sup>All trials took place in the continental US except the following: Mann, 1998 (43), Araya, 2003 (52): Chile; Richards, 2008 (69): UK; Van Straten, 2006 (91) and Van Orden, 2009 (92): Netherlands; Vera, 2010 (76): Puerto Rico; Patel, 2010 (94): India.

<sup>c</sup>Designated trials delivered the patient illness management component predominantly or exclusively via telephone.

On-Line Supplement, Woltmann et al, Chronic Care Models for Mental Health Conditions  
e-Table 2: Summary of Outcome Analyses

| Parent RCT                   | Additional Results Article(s)             | Follow-Up (Mos.) | N Analyzed (CCM / Control)                  | Domain & Outcome(s) <sup>a</sup>                                                                                       | Intervention/ control group outcomes <sup>b,c</sup>                            |
|------------------------------|-------------------------------------------|------------------|---------------------------------------------|------------------------------------------------------------------------------------------------------------------------|--------------------------------------------------------------------------------|
| <b>DEPRESSION</b>            |                                           |                  |                                             |                                                                                                                        |                                                                                |
| Callahan, 1994 (40)          | NA                                        | 9                | Not reported                                | Depression: Mean Hamilton Depression Rating Scale                                                                      | Both groups significantly improved, but without between-groups difference (NS) |
|                              |                                           |                  |                                             | Social Role Function: Sickness Impact Scale                                                                            | Both groups significantly improved, but without between-groups difference (NS) |
| Katon, 1995 (41) & 1996 (42) | Katon, 1995 (41) (major depression group) | 7                | CCM=31<br>Control=34                        | Depression: Major depression group meeting criteria for major depression                                               | No longer met criteria: CCM 7.4% > control 23% (p<0.01)                        |
|                              | Katon, 1995 (41) (minor depression group) | 7                | CCM=46<br>Control=46                        | Depression: % of minor depression group meeting criteria for major depression at 7 months.                             | No proportions reported. (NS)                                                  |
|                              |                                           |                  |                                             | Depression: Minor depression group meeting criteria for minor depression                                               | No longer met criteria: CCM 25.6%, control 33.3% (NS)                          |
|                              | Katon, 1996 (42) (major depression group) | 7                | CCM=49<br>Control=42                        | Depression: % with Symptom Checklist-20 scores improved >50% from baseline                                             | Scores improve >50% from baseline: CCM 74.4% > control 43.8% (p<.01)           |
|                              | Katon, 1996 (42) (minor depression group) | 7                | CCM=59<br>Control=67                        | Depression: % with Symptom Checklist-20 scores improved >50% from baseline                                             | Scores improve >50% from baseline: CCM 60%, control 67.9% (NS)                 |
|                              | Simon, 1998 (95)                          | 7                | Ns not reported by intervention vs. control | Function: % unable to work                                                                                             | % unable to work: CCM 21.5%, control 21.4% in control. (NS)                    |
|                              | Von Korff, 1998 (96)                      | 12               | CCM=41<br>Control=33                        | Economic: Mean total ambulatory costs for participants with major depression using consultant/liaison model or control | CCM \$2765, control \$2444 (no p-value reported)                               |
| CCM=58<br>Control=63         |                                           |                  |                                             | Economic: Mean total ambulatory costs for participants with minor depression using consultant/liaison                  | CCM \$3511, control \$2517 (no p-value reported)                               |

|                       |                               |                      |                                                   |                                                                                                                                  |                                                                                                            |
|-----------------------|-------------------------------|----------------------|---------------------------------------------------|----------------------------------------------------------------------------------------------------------------------------------|------------------------------------------------------------------------------------------------------------|
|                       |                               |                      |                                                   | model or control                                                                                                                 |                                                                                                            |
|                       |                               |                      | CCM=26<br>Control=31                              | Economic: Mean total ambulatory costs for participants with major depression using cognitive behavioral therapy model or control | CCM \$2531, control \$2212 (no p-value reported)                                                           |
|                       |                               |                      | CCM=44<br>Control=36                              | Economic: Mean total ambulatory costs for participants with minor depression using cognitive behavioral therapy model or control | CCM \$2,889, control \$2259 (no p-value reported)                                                          |
| Lin, 1999 (97)        | 19                            | CCM=63<br>Control=53 | Depression: Mean Hamilton Symptom Checklist score | CCM 16.4, control 16.3. (NS)                                                                                                     |                                                                                                            |
| Mann, 1998 (43)       | NA                            | 4                    | CCM= 241<br>Control= 134                          | Depression: Mean Beck Depression Inventory                                                                                       | CCM 10.87, control 10.15 (NS)                                                                              |
| Katon, 1999 (44)      | Katon, 1999 (44)              | 6                    | CCM=114<br>Control=114                            | Depression: Hopkins Symptom Checklist-20                                                                                         | Mixed effects model for continuous variable controlling for several factors was NS at 6 months.            |
|                       | Lin, 2000 (98)                | 12                   | CCM=114<br>Control=114                            | Social Role Function: Mean Sheehan Disability Score                                                                              | CCM 3.4 (95% CI 2.9-3.9), control 4.1 (95% CI 3.6-4.6) in control group (NS)                               |
|                       | Katon, 2002 (99) <sup>a</sup> | 28                   | CCM= 92<br>Control= 95                            | <sup>a</sup> Economic: Total costs                                                                                               | CCM 9799 (CI 7,763-11,834), control 9192 (CI 7,504-10,880) (NS)                                            |
|                       | Simon, 2001 (100)             | 6                    | CCM=84<br>Control=78                              | Depression: Depression-free days                                                                                                 | CCM: 87.7 (CI=76.6–96.7) > control: 70.9 (CI=60.8–81.3); adjusted difference = 16.7 (CI 1.3-31.0) (p=0.02) |
| Katzelnick, 2000 (45) | NA                            | 12                   | CCM=203<br>Control=177                            | Depression: Mean Hamilton Scale score                                                                                            | CCM 9.9 > control 13.6 (p<.001)                                                                            |
| Simon, 2000 (46)      | NA                            | 6                    | CCM=180<br>Control=188                            | Depression: Hopkins Symptom Checklist-20                                                                                         | CCM .98 > control .83 (p<.001)                                                                             |
|                       |                               |                      | CCM=207<br>Control=180                            | <sup>a</sup> Economic: Adjusted mean costs (CCM vs. feedback-only)                                                               | CCM 1673 (SD 3072), feedback-only 1,645 (SD 2646) (NS)                                                     |
|                       |                               |                      | CCM=188<br>Control=180                            | Economic: Adjusted total costs (CCM vs. feedback +care management)                                                               | CCM 1729 (SD 3379), feedback+care management 1645 (SD 2646) (NS)                                           |

|                  |                        |                 |                                        |                                                                                                                     |                                                                                                                                                                                           |
|------------------|------------------------|-----------------|----------------------------------------|---------------------------------------------------------------------------------------------------------------------|-------------------------------------------------------------------------------------------------------------------------------------------------------------------------------------------|
| Wells, 2000 (47) | Wells, 2000 (47)       | 12              | CCM=752<br>Control=374                 | Depression: CES-D-defined depression criteria                                                                       | CCM 54.5% (CI 51.4%-57.7%) > control 61.4% (CI 57.1%-65.7%) (p=.04)                                                                                                                       |
|                  |                        |                 | CCM=752<br>Control=374                 | Mental Quality of Life: Mean MCS-12 score                                                                           | CCM 40.9% (CI 40.1%-41.7%) > control 39.3% (CI 38.3%-40.4%) (p=.04)                                                                                                                       |
|                  |                        |                 | CCM=752<br>Control=374                 | Physical Quality of Life: Mean PCS-12 score                                                                         | 44.1% (CI 43.4%-44.8%) in intervention group vs. 44.6% (CI 43.8%-45.4%) (NS)                                                                                                              |
|                  | Sherbourne, 2001 (101) | 24 <sup>c</sup> | not reported                           | Mental Quality of Life: MCS-12 score(emotional well-being)--needs re-extraction                                     | QI-Meds 40.8, QI-therapy 42.7, control 40.6 (p=.04 for QI-therapy>Control)                                                                                                                |
|                  |                        |                 | not reported                           | Physical Quality of Life: PCS-12-poor role limitations (mean score)                                                 | Means not reported (NS for QI-meds and QI-therapy)                                                                                                                                        |
|                  |                        |                 | 405 QImed, 464 Qltherapy/430           | Depression: Probable depression (CIDI assessment of depressive disorder)                                            | QI-meds 39% (CI 34-43%), QI-therapy 31% (CI 27-36%), control 34% (CI 29-39%) (NS for either CCM vs. control)                                                                              |
|                  | Schoenbaum 2001 (102)  | 24 <sup>c</sup> | 386/371/401                            | Total costs for meds-QI as increase from usual care/total cost for therapy-QI compared to usual care                | Meds-QI 4252 (CI 2815 to 5695 ), Therapy-QI 4320 (2889 to 5752), control 3835 (CI 3282 to 4389) (NS)                                                                                      |
|                  | Wells, 2004 (103)      | 57 <sup>c</sup> | 322 for QI-med, 357 for QI-therapy/312 | Depression: Percentage of probable depression                                                                       | CCM (meds enhanced) 37.9%, 36.2 (CI 30.2-42.3) (therapy-enhanced), control 43.6 (CI 37-50.1), significant for therapy-enhanced only compared to control, adjusting for covariates (p=.05) |
|                  |                        |                 | 322-QI-med, 357QI-therapy/312          | Mental Health Quality of Life: Mental Component Score (Short Form-12)                                               | CCM (meds) 43.9, CCM (therapy) 44.3, 42.6 (control), (NS)                                                                                                                                 |
| Katon, 2001 (48) | Katon, 2001 (48)       | 12              | CCM=194<br>Control=192                 | Depression: Hopkins Symptom Checklist-20                                                                            | CCM > control: Mixed model adjusting for a variety of covariates indicated that CCM patients had, on average, HSC-20 scores 0.08 lower than control. (p<.05)                              |
|                  | Simon, 2002 (104)      | 12              | CCM=190<br>Control=187                 | <sup>a</sup> Economic: Total costs                                                                                  | CCM 2691 (CI 2,320-3,062), control 2619 (CI 2,139-3,099) (NS)                                                                                                                             |
| Rost, 2001 (49)  | Rost, 2001 (49)        | 6               | CCM=243<br>Control=not reported        | Depression: Mean Center for Epidemiological Studies-Depression score among patients beginning new treatment episode | CCM 33.4 > control 39.2 (p=.04)                                                                                                                                                           |
|                  |                        |                 | 189                                    | Mean Center for Epidemiological Studies-Depression score among patients recently treated                            | CCM 42.2, control 46.4 (NS)                                                                                                                                                               |
|                  |                        |                 | not reported                           | Physical role function: Short Form-36                                                                               | CCM 14.1-point improvement in physical functioning greater than control (CI -1.1 to 29.2) (p=NS)                                                                                          |

|                            |                      |                 |                        |                                                                                                                                        |                                                                                                     |
|----------------------------|----------------------|-----------------|------------------------|----------------------------------------------------------------------------------------------------------------------------------------|-----------------------------------------------------------------------------------------------------|
|                            | Pyne, 2003 (105)     | 6               | CCM=178<br>Control=202 | <sup>a</sup> Economic: Total annualized costs (for only females in CCM who accepted antidepressants vs. entire control group of women) | CCM 2,316 (CI 1,803-2,975), control 1,671 (CI 1,269-2,199) (NS)                                     |
|                            | Rost, 2004 (106)     | 24 <sup>c</sup> | CCM=158<br>Control=168 | Social Role Function: Absenteeism                                                                                                      | CCM reduced absenteeism by 10.6 days over 2 years vs. control group. (p=.06)                        |
| Simon, 2001 (50)           | NA                   | 12              | CCM=205<br>Control=169 | Depression: Depression-free days                                                                                                       | CCM: 229.3 > Control: 181.9; adjusted difference = 47.4 days (CI 26.6-68.2). (no p-value reported)  |
|                            |                      |                 |                        | <sup>a</sup> Economic: Total costs                                                                                                     | CCM 5549 (CI 4,313-6,784), control 3909 (CI 3,123-4,695) (no p-value reported)                      |
| Unutzer, 2002 (IMPACT)(51) | Unutzer, 2002 (51)   | 12              | CCM=889<br>Control=870 | <sup>a</sup> Depression: Symptom Checklist-20                                                                                          | CCM .99 (SD .67) > control 1.39 (SD .67), (p<.001)                                                  |
|                            |                      |                 |                        | <sup>a</sup> Overall Quality of Life: Quality of life in past month on a Likert scale (range 0-10)                                     | CCM 6.58 (SD 2.15) > control 6.02 (SD 2.13) (p<.001)                                                |
|                            |                      |                 |                        | <sup>a</sup> Social Role Function: Overall functional impairment adapted from Sheehan Disability Scale (range 0-10)                    | CCM 3.58 (SD 2.8) > control 4.52 (SD 2.73) (p<.001)                                                 |
|                            | Callahan, 2005 (107) | 12              | Not reported           | Physical Quality of Life: Short Form-12                                                                                                | CCM 40.91 (SD 7.33) > control 39.17 (SD 7.23) (p=.04)                                               |
|                            | Unutzer, 2008 (108)  | 48 <sup>c</sup> | CCM=154<br>Control=152 | <sup>a</sup> Economic: Total costs                                                                                                     | CCM 29,422 (CI 26,479 to 32,365), control 32,785 (CI 27,648 to 37,921) (no p-value reported)        |
| Araya, 2003 (52)           | Araya, 2003 (52)     | 6               | CCM=104<br>Control=107 | Depression: Hamilton Depression Rating Scale                                                                                           | CCM > control: Mean difference = -8.89 (CI -11.15 to -6.76) (p<0.0001)                              |
|                            |                      |                 |                        | Mental Quality of Life: Mental Component Score (Short Form-36)                                                                         | CCM 66.2 (SD 26.7) > control 42.8 (SD 25.4); Mean difference 22.78 (CI 16.80-28.77) (p<0.0001)      |
|                            |                      |                 |                        | Physical Quality of Life: Vitality Subscale (Short Form-36)                                                                            | CCM 62.8 (SD 25.7) > control 38.8 (SD 27.0); Mean difference: 21.23 (CI 15.10 to 27.37) (p<0.0001)  |
|                            |                      |                 |                        | Social Role Function: Social Functioning Subscale (Short Form-36)                                                                      | CCM 70.1 (SD 26.7) > control 51.2 (SD 28.9); Mean difference = 19.32 (CI 13.11 to 25.53) (p<0.0001) |

|                             |                    |                           |                          |                                                           |                                                                                                                                                     |
|-----------------------------|--------------------|---------------------------|--------------------------|-----------------------------------------------------------|-----------------------------------------------------------------------------------------------------------------------------------------------------|
|                             | Araya, 2006 (109)  | 12                        | CCM=95<br>Control=95     | Economic: Total Costs (Chilean pesos)                     | CCM 25,362 (CI 22,791–29,854) > control 14,856 (CI 12,420–17,469) (no p-value reported)                                                             |
| Datto, 2003 (54)            | NA                 | 4                         | CCM= 24<br>Control= 26   | <sup>a</sup> Depression: Mean CES-D                       | CCM 14.8 (SD11.2) > control 19.3 (SD 10.3) (p=0.041)                                                                                                |
| Hedrick, 2003 (54)          | Hedrick, 2003 (54) | 9                         | CCM=168<br>Control=186   | Depression: Symptom Checklist-20                          | CCM 1.55, control 1.58 (NS)                                                                                                                         |
|                             |                    |                           |                          | Social Role Function: Sheehan Disability Score            | CCM 5.20, control 5.28 (NS)                                                                                                                         |
|                             | Liu, 2003 (110)    | 9                         | CCM=168<br>Control=186   | <sup>a</sup> Depression: Depression-free days             | CCM 112.7 (SD 81.1), control 107.3 (SD 75.6) (p=.06)                                                                                                |
| Swindle, 2003 (55)          | NA                 | 12                        | CCM= 113<br>Control= 106 | <sup>a</sup> Depression: Mean Beck Depression Inventory   | CCM 17.9 (SD 10.7), control 19.9 (SD 10.9) (NS)                                                                                                     |
|                             |                    |                           |                          | <sup>a</sup> Economic: Total Costs                        | CCM 2,183 (SD 4,052), control 1,760 (SD 4,052) (NS)                                                                                                 |
| Adler, 2004 (56)            | NA                 | 6                         | not reported             | Depression: Mean modified Beck Depression Inventory       | CCM 17.7, control 19.4 (NS)                                                                                                                         |
|                             |                    |                           |                          | Mental Quality of Life: Mental Component Score, SF-36     | CCM 40.4, control 38.6 (NS)                                                                                                                         |
|                             |                    |                           |                          | Physical Quality of Life: Physical Component Score, SF-36 | CCM 42.9, control 42.9 (NS)                                                                                                                         |
| Bruce, 2004 (57) (PROSPECT) | Bruce, 2004 (57)   | 12                        | CCM=221<br>Control=191   | <sup>a</sup> Depression: Mean Ham-D rating scale score    | CCM 9.77 (SD 7.28) > control 10.35 (SD 6.78) (p=.006)                                                                                               |
|                             | Bogner, 2007 (111) | 52 <sup>c</sup><br>median | CCM=70<br>Control=53     | Mortality- depressed patients with diabetes               | CCM 68.2/1000 person-years (CI 41-106.5/1000 person-years), control 103.4/1000 person-years (CI 63.2-159.7/1000 person-years) (no p-value reported) |
|                             |                    |                           | CCM=241<br>Control=220   | Mortality-depressed patients without diabetes             | CCM 36/1000 person-years (CI 25.3-49.6/1000 person-years), control 38.2/1000 person-years (CI 26.4-53.3/1000 person-years) (NS)                     |



|                               |                         |                 |                                                                                                    |                                                                                     |                                                                                                                                                                          |
|-------------------------------|-------------------------|-----------------|----------------------------------------------------------------------------------------------------|-------------------------------------------------------------------------------------|--------------------------------------------------------------------------------------------------------------------------------------------------------------------------|
|                               | Alexopoulos, 2009 (112) | 24 <sup>c</sup> | CCM=183<br>Control=177                                                                             | Depression: HAM-D Score--all depressed patients                                     | CCM 8.81 (SD 7.51) > control 9.28 (SD 6.54) (p=.007)                                                                                                                     |
|                               |                         |                 | CCM=176<br>Control=173                                                                             | Suicidality: Scale for Suicidal Ideation--actively suicidal                         | CCM 11.4 (SD 2.1), control 11.6 (SD .11) (NS)                                                                                                                            |
| Cappocia, 2004 (58)           | NA                      | 12              | CCM= 41<br>Control= 33                                                                             | Depression: Mean Symptom Checklist-20                                               | CCM = control (NS)                                                                                                                                                       |
|                               |                         |                 |                                                                                                    | Mental Quality of Life: Mental Component Score, SF-36                               | CCM = control (NS)                                                                                                                                                       |
|                               |                         |                 |                                                                                                    | Physical Quality of Life: Physical Component Score, SF-36                           | CCM = control (NS)                                                                                                                                                       |
| Dietrich, 2004 (59)           | NA                      | 6               | CCM=179<br>Control=146                                                                             | Depression: Mean Symptom Checklist-20                                               | CCM .97 (SD .80) > control 1.09 (SD .74) (p=.04)                                                                                                                         |
| (Katon, 2004 (60) (Pathways)) | Katon, 2004 (60)        | 12              | CCM=164<br>Control=165                                                                             | Depression: Mean Symptom Checklist-90 scores using a mixed effects regression model | CCM > control: CCM had significantly lower SCL-90 means than Control (p=.03)                                                                                             |
|                               | Simon, 2007 (113)       | 24 <sup>c</sup> | CCM=154<br>Control=165                                                                             | <sup>a</sup> Economic: Total costs                                                  | CCM 21,148 (SD 27,584), control 22,258 (SD 35,607) (no p-value provided)                                                                                                 |
| Simon, 2004 (61)              | Simon, 2004 (61)        | 6               | 207 (Telephone care management) /198 (Telephone care management plus telephone psychotherapy) /195 | Depression: Mean Symptom Checklist-20                                               | Mean difference between TCM and control was not reported (NS); mean difference in scores between TCM-psychotherapy and Control=.33 points on SCL (CCM > control) (p=.02) |
|                               | Ludman, 2007 (114)      | 18 <sup>c</sup> | CCM=180<br>Control=171                                                                             | Depression: Mean Hopkins Symptom Checklist                                          | CCM .68 (SD .55) > control .85 (.65) (p=.001)                                                                                                                            |

|                                                 |                      |                 |                                  |                                                                         |                                                                                                                            |
|-------------------------------------------------|----------------------|-----------------|----------------------------------|-------------------------------------------------------------------------|----------------------------------------------------------------------------------------------------------------------------|
|                                                 | Simon, 2009<br>(115) | 24 <sup>c</sup> | 207 (TCM); 198<br>(TCMP)<br>/195 | <sup>a</sup> Economic: Total costs                                      | CCM TCM=10,268 (SD 9,773)/TCMP=9,334 (SD 8,432), control 9,406 (SD 10,554) (no p-value reported)                           |
| Trivedi,<br>2004<br>(62)                        | NA                   | 12              | CCM=171<br>Control=169           | Mental Health Quality of Life:<br>Mental Health Short Form-12           | Growth curve analysis indicated significant benefit from CCM in months 1-3 (p=0.03) with no difference in months 4-12 (NS) |
| Asarnow,<br>2005 (63)<br>(Youth in<br>Partners) | NA                   | 6               | CCM=170<br>Control=174           | <sup>a</sup> Depression: CES-D total score                              | CCM 19 (SD 11.9) > control 21.4 (SD 13.1) (p=.02)                                                                          |
|                                                 |                      |                 | CCM=211<br>Control=207           | <sup>a</sup> Mental Quality of Life: Mental<br>Component Score, SF-12   | CCM 44.6 (SD 11.3) > control 42.8 (SD 12.9)<br>(p=.03)                                                                     |
| Dwight-<br>Johnson,<br>2005 (64)                | NA                   | 8               | CCM=28<br>Control=27             | Depression: 50% reduction in<br>Patient Health Questionnaire-9<br>score | CCM 37% > control 12% (p=.03)                                                                                              |
| Dobscha,<br>2006 (65)                           | NA                   | 12              | CCM=189<br>Control=189           | Depression: Hopkins Symptom<br>Checklist-20                             | Means not reported. (NS)                                                                                                   |
|                                                 |                      |                 | CCM=186<br>Control=186           | Mental Quality of Life: Mental<br>Component Score (SF-36)               | Means not reported. (NS)                                                                                                   |
|                                                 |                      |                 | Not reported                     | Physical Quality of Life: Physical<br>Component Score (SF-36)           | Means not reported. (NS)                                                                                                   |

|                     |                    |    |                          |                                                                                    |                                                          |
|---------------------|--------------------|----|--------------------------|------------------------------------------------------------------------------------|----------------------------------------------------------|
| Simon, 2006 (66)    | NA                 | 6  | CCM=94<br>Control=94     | Depression: 50% improvement in Hopkins Symptom Checklist Depression Subscale score | CCM 41%, control 37% (NS)                                |
| Fortney, 2007 (67)  | Fortney, 2007 (67) | 12 | not reported             | Depression: 50% improvement in Hopkins Symptom Checklist-20 scores from baseline   | CCM 37%, control 27% (NS)                                |
|                     |                    |    |                          | Overall Quality of Life: Quality of Well-Being Scale                               | CCM 0.04 (SD 0.134), control .03 (SD .13) (NS)           |
|                     | Pyne, 2010 (116)   | 12 | CCM=141<br>Control=179   | Economic: Total Cost                                                               | CCM 7,730 (SE 1,485) < control 4,982 (SE 488) (p<.0001)  |
| Eli, 2008 (68)      | NA                 | 12 | CCM=242<br>Control=230   | Depression: Mean Patient Health Questionnaire-9                                    | CCM 6.4, control 7.14 (NS)                               |
| Richards, 2008 (69) | NA                 | 3  | CCM=35<br>Control=34     | <sup>a</sup> Depression: Patient Health Questionnaire-9 Score                      | CCM 8.8 (SD 7.02), control 10.27 (SD 7.51) (NS)          |
|                     |                    |    | 33/34 (UCr);<br>25 (UCr) | <sup>a</sup> Mental Quality of Life: Short Form-36 mental component score          | CCM 38.71 (SD 15.34) > control 32.35 (SD 16.51) (p=.009) |
|                     |                    |    | CCM=33<br>Control=34     | <sup>a</sup> Physical Quality of Life: Short Form-36 Physical Component Score      | CCM 51.11 (SD 10.36), control 50.76 (SD 11.4), (NS)      |
|                     |                    |    | CCM=33<br>Control=34     | Global Mental Health: CORE-OM clinical outcomes in routine evaluation              | CCM 1.13 (SD .76), control 1.2 (SD .9) (NS)              |
| Ross, 2008 (70)     | NA                 | 6  | CCM=94<br>Control=70     | <sup>a</sup> Depression: Patient Health Questionnaire-9                            | CCM 5.7 (SD 4.9), control 6.0 (SD 5.1) (NS)              |
|                     |                    |    |                          | <sup>a</sup> Mental Health Quality of Life: Short Form 12-Mental Component Score   | CCM 48.6 (SD 10.4), control 47.5 (SD 11.3) (NS)          |

|                                             |    |    |                        |                                                                                       |                                                                 |
|---------------------------------------------|----|----|------------------------|---------------------------------------------------------------------------------------|-----------------------------------------------------------------|
|                                             |    |    |                        | <sup>a</sup> Physical Quality of Life: Short Form 12-Physical Component Score         | CCM 5.7 (SD 4.9), control 6 (SD 5.1) (NS)                       |
| Kroenke, 2009 (71)                          | NA | 12 | CCM=123<br>Control=127 | <sup>a</sup> Depression: Mean Symptom Checklist-20 Score                              | CCM 1.14 (SD 0.69) > control 1.69 (SD 0.74) (p<0.001)           |
|                                             |    |    |                        | Anxiety: Generalized Anxiety Disorder Scale Score                                     | CCM 5.8 (SD 5.0) > control 8.0 (SD 5.1) (p<0.001)               |
|                                             |    |    |                        | <sup>a</sup> Physical Quality of Life: Graded Chronic Pain Scale Disability Score     | CCM 52.5 (SD 31.6) > control 66.1 (SD 27.3) (p<0.001)           |
|                                             |    |    |                        | <sup>a</sup> Social Role Function: SF-36 Social Functioning Scale Score               | CCM 53.1 (SD 30.9), control 47.0 (SD 28.5) (p=0.11)             |
| Rollman, 2009 (72)<br>(Bypassing the Blues) | NA | 8  | CCM=150<br>Control=152 | Depression: Hamilton Rating Scale for Depression                                      | CCM 9 (SD .7) > control 11.4 (SD .7), (p=.001)                  |
|                                             |    |    |                        | Mental Health Quality of Life: Short Form-36 Mental Component Score                   | CCM 50 (SD 1) > control 46.2 (SD 1.1) (p=.02)                   |
|                                             |    |    |                        | Physical Quality of Life: Short -36 Physical Component Form Score                     | CCM 44 (SD .8), control 41.4 (SD .8) (NS)                       |
| Davidson, 2010 (73)                         | NA | 6  | CCM=800<br>Control=77  | <sup>a</sup> Depression: Mean Beck Depression Inventory Score                         | CCM 13.2 (CI 11.1-15.3) > control 17.7 (CI 15.6-19.7) (p=0.003) |
| Eli, 2010 (74)                              | NA | 18 | CCM=144<br>Control=137 | Depression: Remission (Reduction in Symptom Checklist-20 by 50% and final score <0.5) | CCM 40.30% > control 35% (p=.04)                                |
|                                             |    |    |                        | Social Role Function: Sheehan Disability Score                                        | CCM 3.28 (SD 3.12), control 3.18 (SD 2.89) (NS)                 |
|                                             |    |    |                        | Physical Quality of Life: Short Form-12 (physical component score)                    | CCM 39.85 (SD 11.7), control 41.15 (SD 10.89) (NS)              |

|                                |    |    |                        |                                                                                               |                                                                                                                             |
|--------------------------------|----|----|------------------------|-----------------------------------------------------------------------------------------------|-----------------------------------------------------------------------------------------------------------------------------|
|                                |    |    |                        | Mental Quality of Life: Short Form-12 (mental component score)                                | CCM 45.1 (SD 12.19), control 43.49 (SD 11.66) (NS)                                                                          |
| Katon, 2010 (75)               | NA | 12 | CCM=105<br>Control=106 | Depression: Symptom Checklist-20                                                              | CCM .83 (SD .68), control 1.14 (SD .66) (no p-value reported)                                                               |
|                                |    |    |                        | Overall Quality of Life: Quality of Life Scale                                                | CCM 6.2 (SD 2.2) > control 5.2 (SD 1.9) (p<.001)                                                                            |
| Vera, 2010 (76)                | NA | 6  | CCM=89<br>Control=90   | Depression: Hopkins Symptom Checklist-20                                                      | CCM > control; beta -0.03 (treatment x time) (p<0.001)                                                                      |
|                                |    | 18 | CCM=89<br>Control=90   | Social Role Function: Social Function subscale of the Short Form-36                           | CCM > control; beta -0.70 (treatment x time) (p<0.001)                                                                      |
| Yeung 2010 (77)                | NA | 6  |                        | Depression: Remission (Reduction in HDRS by 50% and final score <7)                           | CCM 48%, control 37% (NS)                                                                                                   |
| <b>BIPOLAR DISORDERS</b>       |    |    |                        |                                                                                               |                                                                                                                             |
| Suppes, 2003 (78)              | NA | 12 | 141                    | Depression: Inventory of Depressive Symptomology-Clinician-30 growth rate                     | Growth curve analysis indicated no difference between groups in months 1-3 (NS) or months 4-12 (NS)                         |
|                                |    |    |                        | Mania: Clinician Administered Rating Scale for Mania growth rate                              | Growth curve analysis indicated significant benefit from CCM in months 1-3 (p=0.03) with no difference in months 4-12 (NS)  |
|                                |    |    |                        | Global Mental Health: Brief Psychiatric Rating Scale- growth rate                             | Growth curve analysis indicated significant benefit from CCM in months 1-3 (p=0.001) with no difference in months 4-12 (NS) |
| Bauer, 2006 (79)<br>(CSP #430) | NA | 36 | CCM=157<br>Control=158 | Global Mental Health: Percentage of weeks of reduction in any mood episode over life of study | 14% reduction in CCM vs. control (p=.04)                                                                                    |
|                                |    |    |                        | Mental Health Quality of Life: Short Form-36 mental health                                    | CCM 37.6, > control 34.1 (p=.01)                                                                                            |
|                                |    |    |                        | Physical Health Quality of Life: Short Form-36 physical health                                | CCM 43.4, control 42.9 (NS)                                                                                                 |
|                                |    |    |                        | Social Role Function                                                                          | CCM > control, $\beta = -0.13$ (CI -0.21 - -0.04) (p=0.003)                                                                 |
|                                |    |    |                        | <sup>a</sup> Economic: Total costs                                                            | CCM 61,398 (CI 52,037-71,787), control 64,379 (CI 55,031-73,695) (NS)                                                       |

|                      |    |    |                        |                                                                                             |                                                                     |
|----------------------|----|----|------------------------|---------------------------------------------------------------------------------------------|---------------------------------------------------------------------|
| Simon, 2006 (80)     | NA | 24 | CCM=156<br>Control=175 | Mania: Mean Psychiatric Symptom Rating Mania score                                          | CCM > control (p=0.04); data not provided                           |
|                      |    |    |                        | Depression: Mean Psychiatric Symptom Rating Depression score                                | CCM = control (NS); data not provided                               |
|                      |    |    |                        | <sup>a</sup> Economic: Total costs                                                          | CCM 8,046 (SD 5,974), control 6,743 (SD 6695) (no p-value reported) |
| Kilbourne, 2008 (81) | NA | 3  | CCM=27<br>Control=31   | <sup>a</sup> Mental Quality of Life: Short Form-12 Mental Component Score                   | CCM 34.9 (SD 7.3), control 32.1 (SD 6.7) (NS)                       |
|                      |    |    |                        | <sup>a</sup> Physical Health Quality of Life: Short Form-12 Physical Component Score        | CCM 37 (SD 7.3) > control 35.1 (SD 7.7) (p=0.04)                    |
|                      |    | 6  | CCM=27<br>Control=31   | <sup>a</sup> Depression: Depressive Episode (Internal State Scale)                          | CCM 7.9 (SD 5.8), control 7.9 (SD 5.6) (NS)                         |
|                      |    |    |                        | Mania: Manic Episode (Internal State Scale)                                                 | CCM 17.5 (SD 12.2), control 16.0 (SD 9.0) (NS)                      |
|                      |    |    |                        | <sup>a</sup> Social Role Function: World Health Organization-Disability Assessment Schedule | CCM 18.9 (SD 11.1), control 17 (SD 9.7) (NS)                        |

#### ANXIETY DISORDERS

|                      |                      |                 |                        |                                                                     |                                                                                  |
|----------------------|----------------------|-----------------|------------------------|---------------------------------------------------------------------|----------------------------------------------------------------------------------|
| Rollman, 2005 (82)   | NA                   | 12              | CCM=82<br>Control=61   | Anxiety: Point change (SIGH-A)                                      | CCM > control: 12 month point change vs. usual care: -3.6 (-6.4 to -0.8) (p=.01) |
|                      |                      |                 |                        | Mental Quality of Life: Point change (SF-12 MCS)                    | CCM > control: 12 month point change vs. usual care: 5.8 (1.5 to 10.1) (p=.01)   |
|                      |                      |                 |                        | Physical Quality of Life: Change in hours worked/week from baseline | 12 month point change vs. usual care: 0.1 (-3.8 to 3.6) (p=.96)                  |
| Roy-Byrne, 2005 (83) | Roy-Byrne, 2005 (83) | 12              | CCM=86<br>Control=93   | Anxiety: Anxiety Sensitivity Index                                  | CCM 18.7 > control 25.3 (p<.001)                                                 |
|                      |                      |                 |                        | Depression: mCES-D                                                  | CCM 18.6 > control 22.7 (p=.05)                                                  |
|                      |                      |                 |                        | Social Role Function: High end state functioning                    | CCM .29 > control .16 (p<.001)                                                   |
|                      |                      |                 |                        | Social Role Function: WHO Disability Score                          | CCM 9.63 > control 11.33 (p=.01)                                                 |
|                      | Katon, 2006 (117)    | 24 <sup>c</sup> | CCM=119<br>Control=113 | <sup>a</sup> Economic: Total costs                                  | CCM 4,494 (CI 4,181-4,807), control 4,770 (CI 4,326-5,213) (no p-value reported) |
| Roy-Byrne, 2010 (84) | NA                   | 18              | CCM=503<br>Control=501 | Anxiety: Brief Symptom Inventory for Anxiety (Mean Difference)      | CCM 8.21 (CI 7.43 to 8.98) > control 9.84 (CI 9.05 to 10.62) (p=0.05)            |

|                                    |    |    |                         |                                                                               |                                                                                     |
|------------------------------------|----|----|-------------------------|-------------------------------------------------------------------------------|-------------------------------------------------------------------------------------|
|                                    |    |    |                         | Depression: Patient Health Questionnaire-9                                    | CCM 6.47 (CI 5.92 to 7.03) > control 7.92 (CI 7.36 to 8.49) (p=0.006)               |
|                                    |    |    |                         | Social Role Functioning: Sheehan Disability Score                             | CCM 8.37 (CI 7.62 to 9.12) > control (CI 10.89 (10.13 to 11.65) (p<0.001)           |
|                                    |    |    |                         | Mental Quality of Life: Short Form-12 (mental component score)                | CCM 45.64 (CI 44.57 to 46.71) > control 41.75 (CI 40.67 to 42.84) (p<0.001)         |
|                                    |    |    |                         | Physical Quality of Life: Short Form-12 (physical component score)            | CCM 48.22 (CI 47.18 to 49.26), control 47.35 (CI 46.30 to 48.40) (NS)               |
| <b>OTHER OR MULTIPLE DIAGNOSES</b> |    |    |                         |                                                                               |                                                                                     |
| Coleman, 1999 (85)                 | NA | 24 | CCM= 78<br>Control = 49 | Depression: Mean CES-D Score                                                  | CCM 14.8, control 17.4 (NS)                                                         |
|                                    |    |    |                         | Physical Quality of Life: Short Form-36 Physical Component Score              | CCM 37.5, control 37.5 (NS)                                                         |
|                                    |    |    |                         | Economics: Total Costs                                                        | CCM 9,535, control 10,116 (NS)                                                      |
| Druss, 2001 (86)                   | NA | 12 | CCM= 59<br>Control = 61 | <sup>a</sup> Physical Quality of Life: Short Form-36 Physical Component Score | CCM 50.9 (SD 7.1) > control 45.3 (SD 9.8) (p<0.001)                                 |
|                                    |    |    |                         | <sup>a</sup> Mental Quality of Life: Short Form-36 Mental Component Score     | CCM 35.0 (SD 14.6), control 37.1 (SD 13.9) (NS)                                     |
|                                    |    |    |                         | <sup>a</sup> Global Mental Health: Symptom Checklist-90 Score                 | CCM 77.1 (SD 21.4), control 79.7 (SD 25.0) (NS)                                     |
|                                    |    |    |                         | Substance Use: Addiction Severity Index Drug Score                            | CCM 0.07 (SD 0.04), control 0.09 (SD 0.06) (NS)                                     |
|                                    |    |    |                         | Substance Use: Addiction Severity Index Drug Score                            | CCM 0.04 (SD 0.18), control 0.01 (SD 0.17) (NS)                                     |
|                                    |    |    |                         | <sup>a</sup> Economics: Total Costs                                           | CCM 12,010 (SD 13,271), control 14,543 (SD 15,871) (NS)                             |
| Oslin, 2003 (87)                   | NA | 4  | 46                      | <sup>a</sup> Depression: Hamilton Depression Rating Scale                     | CCM 11.1 (SD 6.6) > control 16.3 (SD 9.4) (p=.048)                                  |
| Zatzick, 2004 (88)                 | NA | 12 | 61                      | PTSD: Post-traumatic stress disorder rate                                     | CCM 0.07% (CI -4.2% to 4.3%) > control 6% (CI 3.1% to 9.3%) (p=.001)                |
|                                    |    |    |                         | Substance Abuse: CIDI-rate of decrease from baseline of diagnosis of alcohol  | CCM 24.2% (95% CI, -19.9% to -28.6%) > control 12.9% (95% CI, 8.2%-17.7%). (p=.001) |

|                             |    |    |                                                                      |                                                                                                               |                                                                                                                                                                     |
|-----------------------------|----|----|----------------------------------------------------------------------|---------------------------------------------------------------------------------------------------------------|---------------------------------------------------------------------------------------------------------------------------------------------------------------------|
|                             |    |    |                                                                      | abuse/dependence                                                                                              |                                                                                                                                                                     |
| Callahan, 2006<br>(89)      | NA | 18 | CCM=65<br>Control=49                                                 | Cognition: Neuropsychiatric Inventory                                                                         | CCM 8.4 (SD 10.2) > control 16.2 (SD 18.7) (p=.01)                                                                                                                  |
|                             |    |    | CCM=170<br>Control=174                                               | <sup>a</sup> Depression: Cornell Scale for Depression in Dementia                                             | CCM 19 (SD 11.9) > control 21.4 (SD 31.1) (p=.02)                                                                                                                   |
|                             |    |    | CCM=65<br>Control=49                                                 | Physical Quality of Life: Caregiver patient health questionnaire-9                                            | CCM 3.1 (SD 4.5) > control 5.2 (SD 5.3) (p=.02)                                                                                                                     |
| Smith, 2006 (90)            | NA | 12 | CCM=101<br>Control=105                                               | <sup>a</sup> Depression: Center for Epidemiological Studies-Depression                                        | CCM Odds Ratio for improvement vs. baseline: 3.17 (CI 1.27 to 5.08); control Odds Ratio for improvement vs. baseline: 1.73 (CI 0.14 to 3.60) (no p-values reported) |
|                             |    |    |                                                                      | Mental Quality of Life: Percentage of improvement (4 point increase in Short Form-12, mental component score) | CCM 49% > control 33.3%; Odds Ratio for improvement: 2.16 (1.14 to 4.10) (p=0.019)                                                                                  |
| Van Straten, 2006<br>(91)   | NA | 18 | 155 (Cognitive Behavioral Therapy)/141 (Brief therapy)/183 (Control) | Global Mental Health: Symptom Checklist-90                                                                    | Odds Ratio for CBT with control as Reference: 2.18 (CI 4.93 to 0.57) (NS)<br>Odds Ratio for BT with control as Reference: 0.12 (2.96 to 3.19) (NS)                  |
|                             |    |    |                                                                      | Mental Quality of Life: Short Form-36 (good health)                                                           | Odds Ratio for CBT with control as Reference: 0.73 (CI 0.69 to 2.14) (NS);<br>Odds Ratio for BT with control as Reference: 0.56 (CI 0.87 to 1.99) (NS)              |
| Van Orden<br>2009 (92)      | NA | 12 | CCM=71<br>Control=43                                                 | <sup>a</sup> Global Mental Health: Symptom Checklist-90                                                       | CCM 158.9 (SD 64.6), control 154.4 (SD 52.4) (NS)                                                                                                                   |
|                             |    |    | CCM=70<br>Control=43                                                 | <sup>a</sup> Overall Quality of Life: World Health Organization Quality of Life-BREF                          | CCM 3.3 (SD .9), control 3.3 (SD .7) (NS)                                                                                                                           |
| Druss, 2010<br>(PCARE) (93) | NA | 12 | CCM=205<br>Control=202                                               | <sup>a</sup> Physical Quality of Life: Short Form-36 Physical Component Score                                 | CCM 37.1 (SD 11.5), control 34.7 (SD 11.9) (NS)                                                                                                                     |
|                             |    |    |                                                                      | <sup>a</sup> Mental Quality of Life: Short Form-36 Mental Component Score                                     | CCM 39.3 (SD 9.9) > control 35.6 (SD 10.1) (p=0.008)                                                                                                                |
| Patel, 2010 (94)            | NA | 6  | CCM=1098<br>Control=1144                                             | Global Mental Health: ICD-10 Common Mental Disorders Screen positive for current mental disorder              | Risk Ratio for recovery from common mental disorders, CCM > control reference: 1.22 (1.00–1.47) (p=0.05)                                                            |

<sup>a</sup>We have used alternate light-dark shading of rows in order for the reader to more easily visualize analyses together with their parent trial. Superscript a indicates outcome analyses that were included in meta-analysis



<sup>b</sup>Since specific outcome instrument valence may not be known to all readers (e.g., fewer depressive symptoms, better social role function, lower costs), “>” or “<” designates whether significant results favor CCM or control.

<sup>c</sup>These analyses reflect long-term residual clinical effects or economic impact of the intervention assessed months to years after the cessation of the initial controlled trial.
